# Supplementary material for: Abnormally located SSEA1+/SOX9+ endometrial epithelial cells with a basalis-like phenotype in the eutopic functionalis layer may play a role in the pathogenesis of endometriosis
Source: PubMed Central journal article supplement (PMC6295963; doi:10.1093/humrep/dey336), 2018-11-29
Supplement: dey336supplement_figure3.pdf [file dey336supplement_figure3.pdf]

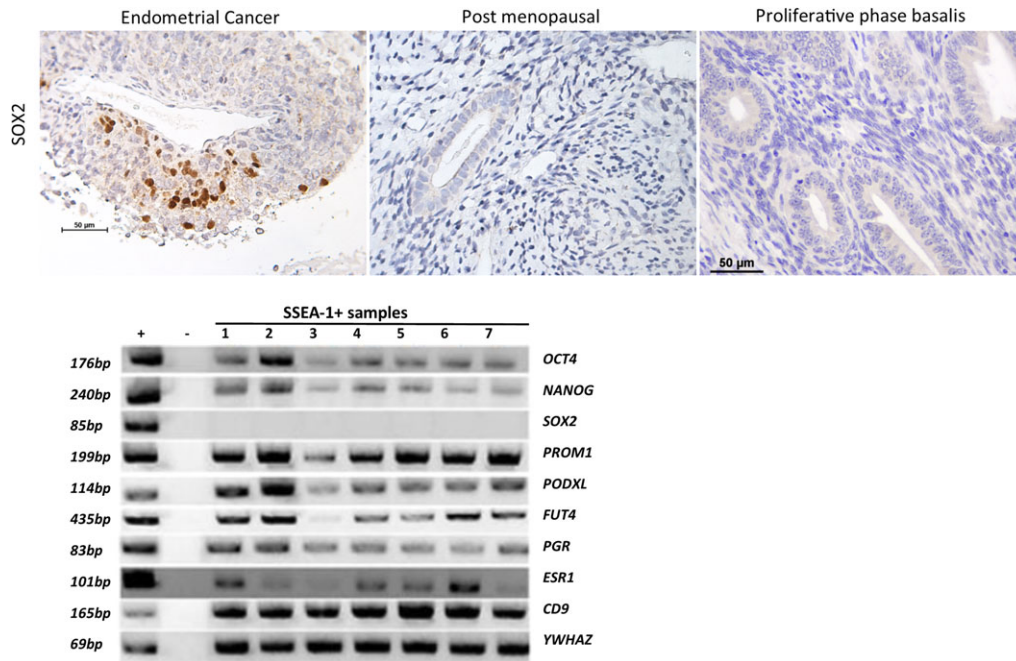

**Supplementary Figure S3** Micrographs showing positive nuclear **SOX2** expression in endometrial cancer, but no positive staining was observed in the full thickness healthy endometrium. Representative micrographs of postmenopausal endometrium and proliferative phase *basalis* endometrium shown. Agarose gel confirmation of molecular size for PCR amplicons, positive and negative control samples and SSEA1+ sorted cells.
