# Supplementary material for: Abnormally located SSEA1+/SOX9+ endometrial epithelial cells with a basalis-like phenotype in the eutopic functionalis layer may play a role in the pathogenesis of endometriosis
Source: PubMed Central journal article supplement (PMC6295963; doi:10.1093/humrep/dey336), 2018-11-29
Supplement: dey336supplement_table1.pdf [file dey336supplement_table1.pdf]

**Supplementary Table SI Demographic data.**

| Subject | Cycle stage   | Smoker* | Endometriosis stage | Parity | Age (y) | BMI (kg/m <sup>2</sup> ) | FT/pipelle |
|---------|---------------|---------|---------------------|--------|---------|--------------------------|------------|
| 1       | Menstrual     | 0       | 3–4                 | 0      | 41      | 24.2                     | FT         |
| 2       | Menstrual     | 1       | 2                   | 3      | 42      | 22.4                     | FT         |
| 3       | Proliferative | 0       | 4                   | 0      | 39      | 24.8                     | pipelle    |
| 4       | Proliferative | 0       | 2–3                 | 0      | 38      | 28                       | pipelle    |
| 5       | Proliferative | 0       | 2                   | 0      | 23      | 25.5                     | pipelle    |
| 6       | Proliferative | 0       | 1                   | 1      | 36      | 29.7                     | pipelle    |
| 7       | Proliferative | 0       | 1                   | 1      | 39      | 25                       | FT         |
| 8       | Proliferative | 1       | 2                   | 0      | 45      | 32                       | FT         |
| 9       | Proliferative | 0       |                     | 1      | 21      | 18.7                     | pipelle    |
| 10      | Proliferative | 0       | 1                   | 2      | 41      | 26.6                     | pipelle    |
| 11      | Proliferative | 0       | 1                   | 2      | 45      | 27.2                     | FT         |
| 12      | Proliferative | 0       | 2                   | 0      | 31      | 27                       | pipelle    |
| 13      | Secretory     | 0       | 4                   | 0      | 31      | 20.5                     | pipelle    |
| 14      | Secretory     | 1       | 1                   | 2      | 48      | 22.9                     | FT         |
| 15      | Secretory     | 0       | 2                   | 0      | 46      | 23.9                     | pipelle    |
| 16      | Secretory     | 0       | 2                   | 0      | 43      | 28.4                     | pipelle    |
| 17      | Secretory     | 1       | 4                   | 0      | 27      | 20.6                     | pipelle    |
| 18      | Secretory     | 1       | 1                   | 0      | 28      | 25.5                     | pipelle    |
| 19      | Secretory     | 0       | 3–4                 | 1      | 31      | 28.3                     | pipelle    |
| 20      | Secretory     | 0       | 3                   | 0      | 24      |                          | pipelle    |
| 21      | Secretory     | 0       | 4                   | 0      | 46      |                          | FT         |
| 22      | Secretory     | 0       | 1                   | 0      | 38      | 25.2                     | pipelle    |
| 23      | Secretory     | 0       | 4                   | 1      | 39      | 29.6                     | FT         |
| 24      | Secretory     | 0       | 4                   | 2      | 31      | 26.8                     | pipelle    |
| 25      | Secretory     | 0       | 2                   | 2      | 45      | 20.5                     | FT         |
| 26      | Secretory     | 0       | 2                   | 2      | 30      | 23.8                     | FT         |
| 27      | Secretory     | 0       | 1                   | 2      | 33      | 20.3                     | FT         |
| 28      | Secretory     | 0       | 1                   | 0      | 38      | 23.3                     | FT         |
| 29      | Secretory     | 1       | 4                   | 1      | 34      | 28                       | FT         |
| 30      | Secretory     | 0       | 2                   | 4      | 45      | 29.5                     | FT         |
| 31      | Secretory     | 1       | 1                   | 3      | 44      | 34.9                     | FT         |
| 32      | Secretory     | 0       | 4                   | 0      | 48      | 29.2                     | FT         |
| 33      | Secretory     | 1       | 1–2                 | 2      | 41      | 27.8                     | pipelle    |
| 34      | Secretory     | 1       | 4                   | 1      | 37      | 37.8                     | pipelle    |
| 35      | Secretory     | 0       | 4                   | 2      | 27      |                          | pipelle    |
| 36      | Secretory     | 0       | 1                   | 0      | 24      | 18.4                     | pipelle    |
| 37      | Secretory     | 0       | 1                   | 0      | 39      | 22.8                     | pipelle    |
| 38      | Secretory     | 1       | 3                   | 0      | 34      | 18.9                     | pipelle    |
| 39      | Secretory     | 0       | 4                   | 1      | 31      | 40.6                     | pipelle    |
| 40      | Secretory     | 0       | 2.5                 | 0      | 25      | 17.1                     | pipelle    |
| 41      | Secretory     | 0       | 4                   | 0      | 34      | 35                       | pipelle    |
| 42      | Secretory     | 1       | 3                   | 1      | 43      | 26.2                     | FT         |
| 43      | Secretory     | 1       | 1                   | 0      | 29      | 20.6                     | pipelle    |
| 44      | Secretory     | 0       | 1                   |        | 34      | 26.3                     | pipelle    |
| 45      | Menstrual     | 0       | 0                   | 3      | 45      | 36.4                     | FT         |
| 46      | Menstrual     | 0       | 0                   | 2      | 32      | 26.6                     | FT         |
| 47      | Menstrual     | 0       | 0                   | 2      | 38      | 26.6                     | pipelle    |

*Continued*

**Supplementary Table S1** *Continued*

| Subject | Cycle stage   | Smoker* | Endometriosis stage | Parity | Age (y) | BMI (kg/m <sup>2</sup> ) | FT/pipelle |
|---------|---------------|---------|---------------------|--------|---------|--------------------------|------------|
| 48      | Proliferative | 0       | 0                   | 3      | 41      | 24.7                     | FT         |
| 49      | Proliferative | 1       | 0                   | 2      | 45      | 34.6                     | FT         |
| 50      | Proliferative | 1       | 0                   | 2      | 41      | 22.6                     | FT         |
| 51      | Proliferative | 0       | 0                   | 0      | 30      | 25                       | pipelle    |
| 52      | Proliferative | 1       | 0                   | 2      | 32      | 27.8                     | FT         |
| 53      | Proliferative | 0       | 0                   | 3      | 31      | 39.8                     | pipelle    |
| 54      | Proliferative | 0       | 0                   | 2      | 42      | 29.8                     | pipelle    |
| 55      | Proliferative | 0       | 0                   | 3      | 43      | 40.5                     | FT         |
| 56      | Proliferative | 0       | 0                   | 2      | 45      | 33.1                     | FT         |
| 57      | Proliferative | 0       | 0                   | 1      | 32      | 52.2                     | FT         |
| 58      | Proliferative | 0       | 0                   | 1      | 47      | 23.4                     | FT         |
| 59      | Proliferative | 0       | 0                   | 3      | 46      | 23.1                     | FT         |
| 60      | Proliferative | 0       | 0                   | 2      | 47      | 21.6                     | FT         |
| 61      | Proliferative | 0       | 0                   | 2      | 44      | 38                       | FT         |
| 62      | Proliferative | 0       | 0                   | 2      | 44      | 31.6                     | FT         |
| 63      | Proliferative | 0       | 0                   | 2      | 37      | 39.2                     | FT         |
| 64      | Proliferative | 0       | 0                   | 1      | 44      | 29.6                     | FT         |
| 65      | Proliferative | 0       | 0                   | 3      | 50      | 26.3                     | FT         |
| 66      | Proliferative | 1       | 0                   | 4      | 47      | 27.7                     | FT         |
| 67      | Proliferative | 0       | 0                   | 1      | 30      | 26.7                     | FT         |
| 68      | Proliferative | 0       | 0                   | 2      | 44      | 24.5                     | pipelle    |
| 69      | Proliferative | 0       | 0                   | 1      | 46      | 25.4                     | FT         |
| 70      | Secretory     | 0       | 0                   | 4      | 41      | 33.4                     | FT         |
| 71      | Secretory     | 0       | 0                   | 5      | 27      | 23                       | pipelle    |
| 72      | Secretory     | 0       | 0                   | 2      | 40      | 32.4                     | pipelle    |
| 73      | Secretory     | 0       | 0                   | 3      | 43      | 35.2                     | pipelle    |
| 74      | Secretory     | 0       | 0                   | 4      | 37      | 31.6                     | pipelle    |
| 75      | Secretory     | 1       | 0                   | 2      | 45      | 27.4                     | pipelle    |
| 76      | Secretory     | 0       | 0                   | 3      | 38      | 28.1                     | pipelle    |
| 77      | Secretory     | 0       | 0                   | 5      | 46      | 26.8                     | FT         |
| 78      | Secretory     | 1       | 0                   | 2      | 46      | 27.4                     | FT         |
| 79      | Secretory     | 0       | 0                   | 3      | 31      | 24.9                     | FT         |
| 80      | Secretory     | 0       | 0                   | 2      | 37      | 22.7                     | FT         |
| 81      | Secretory     | 1       | 0                   | 4      | 41      | 26.7                     | FT         |
| 82      | Secretory     | 0       | 0                   | 2      | 48      | 37.3                     | pipelle    |
| 83      | Secretory     | 1       | 0                   | 4      | 37      | 21.7                     | FT         |
| 84      | Secretory     | 0       | 0                   | 3      | 37      | 40                       | FT         |
| 85      | Secretory     | 0       | 0                   | 0      | 47      | 22.6                     | FT         |
| 86      | Secretory     | 0       | 0                   |        | 45      | 31.6                     | FT         |
| 87      | Secretory     | 1       | 0                   | 0      | 28      | 24.3                     | pipelle    |
| 88      | Secretory     | 0       | 0                   | 3      | 37      | 41.5                     | FT         |
| 89      | Secretory     | 1       | 0                   | 2      | 41      | 18.9                     | pipelle    |
| 90      | Secretory     | 1       | 0                   | 6      | 39      | 22.4                     | pipelle    |
| 91      | Secretory     | 0       | 0                   | 2      | 44      | 21                       | pipelle    |
| 92      | Secretory     | 0       | 0                   | 3      | 30      | 28.1                     | FT         |
| 93      | Secretory     | 0       | 0                   | 0      | 21      | 25.9                     | pipelle    |
| 94      | Secretory     | 1       | 0                   | 4      | 45      | 21.7                     | FT         |

*Continued*

**Supplementary Table SI** *Continued*

| <b>Subject</b> | <b>Cycle stage</b> | <b>Smoker*</b> | <b>Endometriosis stage</b> | <b>Parity</b> | <b>Age (y)</b> | <b>BMI (kg/m<sup>2</sup>)</b> | <b>FT/pipelle</b> |
|----------------|--------------------|----------------|----------------------------|---------------|----------------|-------------------------------|-------------------|
| 95             | Secretory          | 1              | 0                          | 2             | 44             | 24.3                          | FT                |
| 96             | Secretory          | 1              | 0                          | 4             | 39             | 22.6                          | FT                |
| 97             | Secretory          | 0              | 0                          | 3             | 47             | 19.7                          | pipelle           |
| 98             | Secretory          | 1              | 0                          | 2             | 37             | 26.5                          | FT                |
| 99             | Secretory          | 0              | 0                          | 4             | 27             | 21.1                          | pipelle           |
| 100            | Secretory          | 0              | 0                          | 2             | 49             | 28.4                          | FT                |
| 101            | Secretory          | 0              | 0                          | 1             | 45             | 29.3                          | FT                |
| 102            | Secretory          | 0              | 0                          | 2             | 42             | 30.3                          | FT                |

\*0 = No 1 = Yes.

FT = full thickness hysterectomy endometrial sample.
