# Supplementary material for: Abnormally located SSEA1+/SOX9+ endometrial epithelial cells with a basalis-like phenotype in the eutopic functionalis layer may play a role in the pathogenesis of endometriosis
Source: PubMed Central journal article supplement (PMC6295963; doi:10.1093/humrep/dey336), 2018-11-29
Supplement: dey336supplement_table2.pdf [file dey336supplement_table2.pdf]

**Supplementary Table SII Antibody details.**

| <b>Target</b>    | <b>Host species</b> | <b>Clone</b> | <b>Antigen retrieval conditions</b> | <b>Dilution</b> | <b>Incubation time &amp; temperature</b> | <b>Supplier</b>                       |
|------------------|---------------------|--------------|-------------------------------------|-----------------|------------------------------------------|---------------------------------------|
| SSEA1            | Mouse               | MC-480       | Tris-EDTA pH 9.0                    | 1:800           | 4°C overnight                            | Biologend, London, UK                 |
| SOX2             | Rabbit              | D6D9         | Citrate pH 6.0                      | 1:50            | 4°C overnight                            | Cell Signalling Technology, Herts, UK |
| SOX9             | Goat                | N/A          | Citrate pH 6.0                      | 1:400           | 4°C overnight                            | Cell Signalling Technology, Herts, UK |
| Ki67             | Mouse               | MM1          | Citrate pH 6.0                      | 1:200           | 4°C overnight                            | Leica (Novocastra) Newcastle, UK      |
| ER $\alpha$      | Rabbit              | N/A          | Citrate pH 6.0                      | 1:50            | Room temperature, 2 h                    | Abcam, Cambridge, UK                  |
| ER $\beta$       | Mouse               | PPG5/10      | Citrate pH 6.0                      | 1:50            | 4°C overnight                            | Biorad (AbD Serotec) Kidlington, UK   |
| PR               | Mouse               | PgR636       | Citrate pH 6.0                      | 1:1000          | Room temperature, 30 min                 | DAKO (Agilent), Stockport, UK         |
| Laminin          | Rabbit              | N/A          | Proteinase K                        | 1:800           | 4°C overnight                            | DAKO (Agilent), Stockport, UK         |
| Cytokeratin 18   | Mouse               | DC10         | Citrate pH 6.0                      | 1:800           | 4°C overnight                            | DAKO (Agilent), Stockport, UK         |
| $\beta$ -catenin | Rabbit              | 6B3          | Citrate pH 6.0                      | 1:200           | 4°C overnight                            | Cell Signalling Technology, Herts, UK |
| AR               | Mouse               | AF-441       | Citrate pH 6.0                      | 1:75            | 4°C overnight                            | DAKO (Agilent), Stockport, UK         |
| MUC-1            | Mouse               | BC2          | Citrate pH 6.0                      | 1:100           | 4°C overnight                            | Biorad (AbD Serotec) Kidlington, UK   |

**Supplementary Table SIII Primers used for qPCR.**

| Gene        | qPCR primer sequence                                                         | Product Size (bp) | Annealing Temperature (°C) | Source                     |
|-------------|------------------------------------------------------------------------------|-------------------|----------------------------|----------------------------|
| OCT4        | F: 5'AGAACCGAGTGAGAGGCAA3'<br>R: 5'CTCTCGTTGTGCATAGTCGC3'                    | 176               | 56                         | In house                   |
| NANOG       | F: 5'CGGAGACTGTCTCTCCTT3'<br>R: 5'GTTCTTGCATCTGCTGGAGG3'                     | 240               | 56                         | In house                   |
| SOX2        | F: 5'CGAGATAAACATGGCAATCAAAT3'<br>R: 5'AATTCAGCAAGAAGCCTCTCCTT3'             | 85                | 56                         | (Wong et al., 2010)        |
| PODXL       | F: 5'CCATCGTCTGCATGGCATCA3'<br>R: 5'CTGTCTGCAGCTCCTCTGTT3'                   | 114               | 56                         | In house                   |
| CD133       | F: 5'TGCAACAGCATCAGATTGTC3'<br>R: 5'TACCTGCTACGACAGTCGTG3'                   | 199               | 56                         | In house                   |
| CD9         | F: 5'GACACCTACAACAAGCTGAA3'<br>R: 5'ACAGGACTTCACGGTGAAGG3'                   | 165               | 56                         | In house                   |
| ER $\alpha$ | F: 5'TGATTGGTCTCGTCTGGCG3'<br>R: 5'CATGCCCTCTACACATTTCC3'                    | 101               | 56                         | (Henderson et al., 2003)   |
| PR          | F: 5'CAGTGGGCGTTCCAAATGA3'<br>R: 5'TGGTGAATCAACTGTATGTCTTGA3'                | 83                | 56                         | (Henderson et al., 2003)   |
| FUT4        | F: 5'CAGCTGGTTCGAGCGGTGAAGCCGCGCT3'<br>R: 5'CAGAAAAACGTGAATCGGGAACAGTTGTGT3' | 435               | 60                         | (Ponnampalam et al., 2008) |
| FUT3        | F: 5'GCCGACCGCAAGGTGTAC3'<br>R: 5'TGACTTAGGGTTGGACATGATATCC3'                | 75                | 60                         | (Higai et al., 2006)       |
| SOX9        | F: 5'GTACCCGCACTTGCACAAC 3'<br>R: 5'TCTCGCTCTCGTTCAGAAGTC 3'                 | 74                | 61                         | (Masuda et al., 2010)      |
| YWHAZ       | F: 5'CGTACTTGGCTGAGGTTGCC3'<br>R: 5'GTATGCTTGGTGTGACTGATCGAC3'               | 69                | 56                         | (Marullo et al., 2010)     |

## References

Henderson TA, Saunders PT, Moffett-King A, Groome NP, Critchley HO. Steroid receptor expression in uterine natural killer cells. *The Journal of Clinical Endocrinology and Metabolism* 2003;88:440–449.

Higai K, Ishihara S, Matsumoto K. NFkappaB-p65 dependent transcriptional regulation of glycosyltransferases in human colon adenocarcinoma HT-29 by stimulation with tumour necrosis factor alpha. *Biological & Pharmaceutical Bulletin* 2006;29:2372–2377.

Marullo M, Zuccato C, Mariotti C, Lahiri N, Tabrizi SJ, Di Donato S, Cattaneo E. Expressed Alu repeats as a novel, reliable tool for

normalisation of real-time quantitative RT-PCR data. *Genome Biol* 2010;11.

Masuda H, Matsuzaki Y, Hiratsu E, Ono M, Nagashima T, Kajitani T, Arase T, Oda H, Uchida H, Asada H et al. Stem cell-like properties of the endometrial side population: implication in endometrial regeneration. *PLoS One* 2010;5: e10387.

Ponnampalam AP, Gargett CE, Rogers PA. Identification and hormonal regulation of a novel form of NKp30 in human endometrial epithelium. *Eur J Immunol* 2008;38:216–226.

Wong OG, Huo Z, Siu MK, Zhang H, Jiang L, Wong ES, Cheung AN. Hypermethylation of SOX2 Promoter in Endometrial Carcinogenesis. *Obstet Gynecol Int* 2010;2010.
